# Supplementary material
Source: Springer Nature journal article supplement (https://www.springermedizin.de/resource/supplementary/12958_2010_719_MOESM1_ESM.pdf/9568682)

Liver  
Stomach  
Duodenum  
Spleen  
Heart (Ventricle)  
Lung  
Kidney  
Adrenal gland  
Pituitary  
Corpus luteum  
Testis  
Uterus  
Placentome

**DERL1**

3 kb —  
2.6 kb —

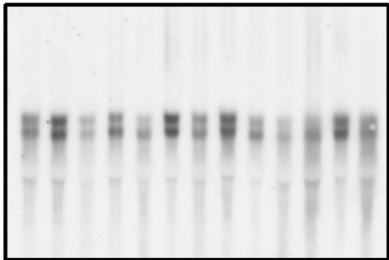

Supplement: MOESM1 [file 9568682]
